# Supplementary material for: Phlorizin exerts potent effects against aging induced by d-galactose in mice and PC12 cells
Source: Royal Society of Chemistry journal article supplement (doi:10.1039/d0fo02707c), 2021-01-01
Supplement: d0fo02707c1.pdf [file d0fo02707c1.pdf]

1 **supplementary material:**

2 Table 1. Primer sequences for real time PCR.

| Gene               | Forward                 | Reverse                 |
|--------------------|-------------------------|-------------------------|
| <i>Nrf2 (mice)</i> | CCGGGGAACAGAACAGGAAA    | ACGTTGTCCCCATTTTTGCG    |
| <i>Keap1</i>       | GTGGCACCTACAGAGACACC    | GCGCTTGGAGAAGGGCA       |
| <i>NQO1</i>        | GAACCCAGTCTATGCCCCAC    | GGCGTGCAAGGGATGATTTC    |
| <i>HO-1</i>        | AGGGCAGAAGGGAATTGCTC    | AAAGAGCTGGAGAGCCAACC    |
| <i>CAT</i>         | TGAACTTCCTGGATGAGATGTC  | TCTTGGCGGCACAATACTG     |
| <i>GSH1</i>        | ACCAGGAGAATGGCAAGAA     | TCCTCCTTTCTTCCCACCG     |
| <i>SOD1</i>        | CTCGTCTTGCTCTCTCTGGTC   | CTTCTGCTCGAAGTGGATGG    |
| <i>GAPDH</i>       | GGAGAAACCTGCCAAGTATG    | GGAGTTGCTGTTGAAGTCG     |
| Nrf2 (PC12)        | GCCTTCCTCTGCTGCCATTAGTC | TCATTGAACTCCACCGTGCCTTC |
| NQO1               | TCACCACTCTACTTTGCTCCAA  | TTTTCTGCTCCTTGAACCTC    |
| HO-1               | GCCCTGGAAGAGGAGATAGAG   | TAGTGCTGTGTGGCTGGTGT    |
| GAPDH              | CAGTGCCAGCCTCGTCTCAT    | AGGGGCCATCCACAGTCTTC    |
